# Supplementary material for: Discovery of potential hypoglycemic metabolites in Cassiae Semen by coupling UHPLC-QTOF-MS/MS combined plant metabolomics and spectrum-effect relationship analyses
Source: Royal Society of Chemistry journal article supplement (doi:10.1039/d2fo00562j), 2022-01-01
Supplement: d2fo00562j1.pdf [file d2fo00562j1.pdf]

## Supplementary materials

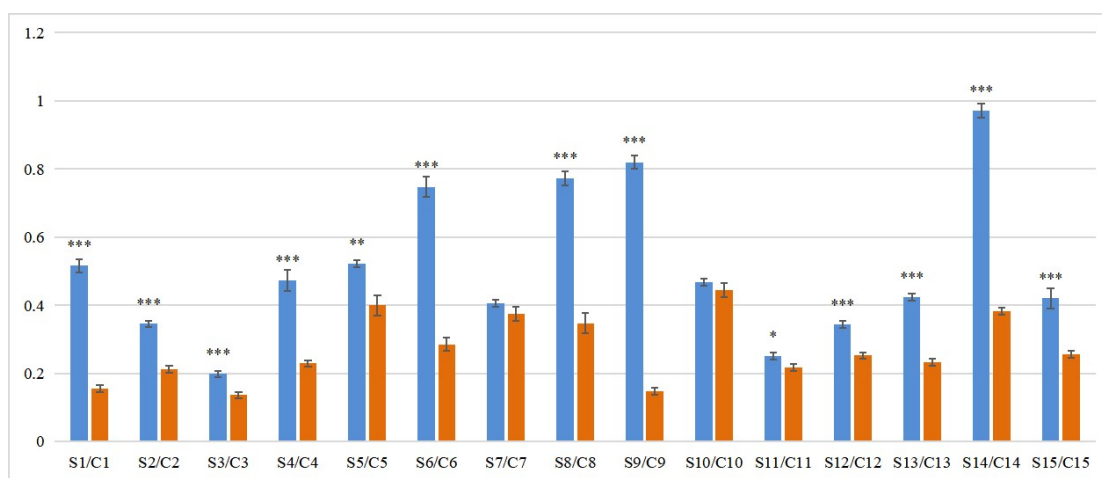

**Fig. S1** The  $\alpha$ -glucosidase inhibition activity of 30 batches of raw and fried Cassiae Semen samples. (\* $P < 0.05$ , \*\* $P < 0.01$ , \*\*\* $P < 0.001$ )

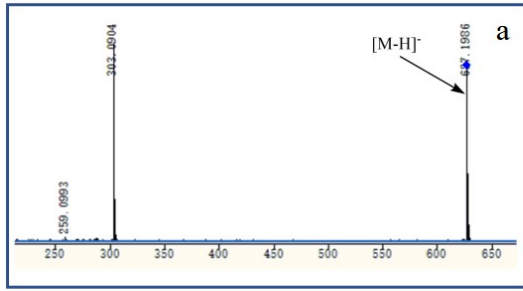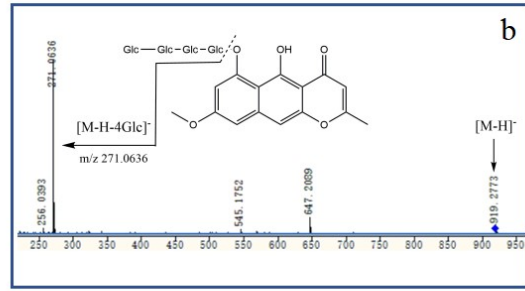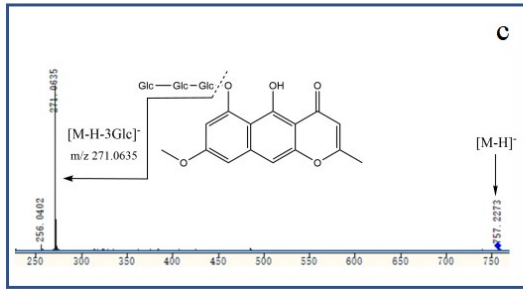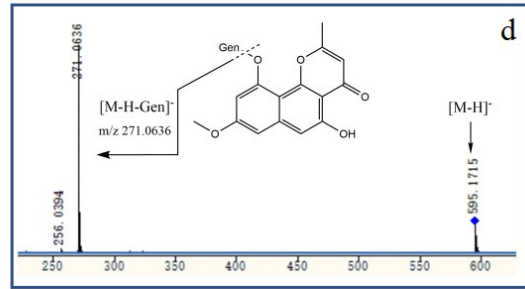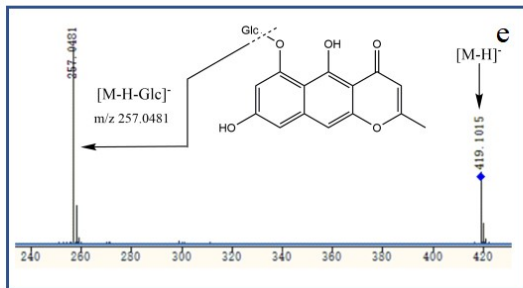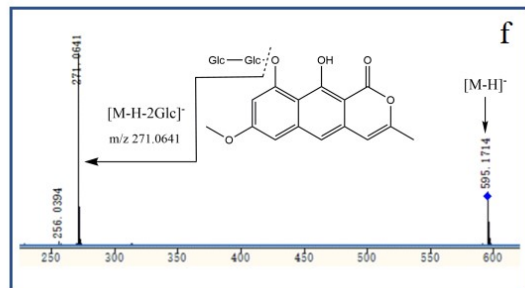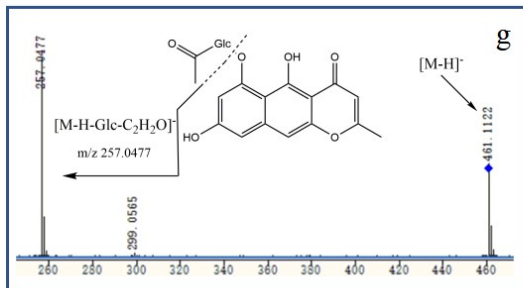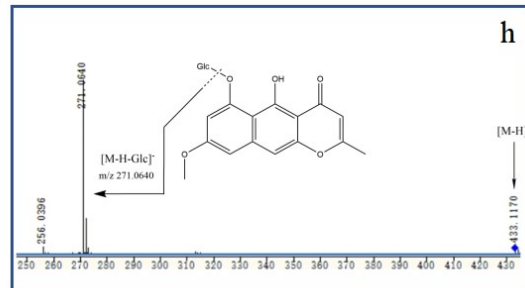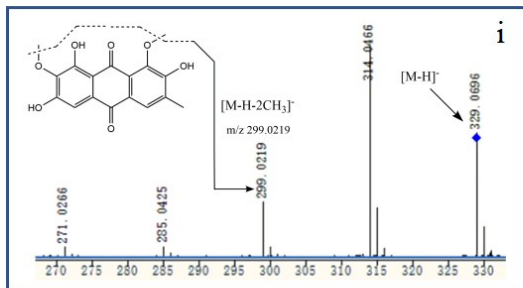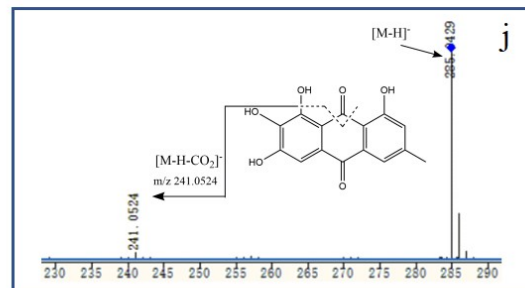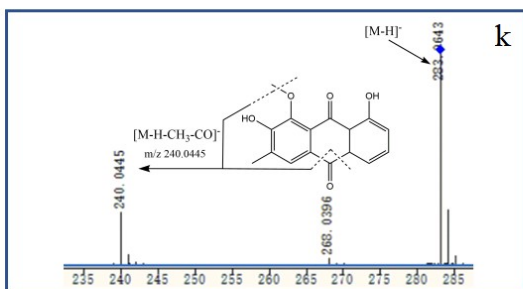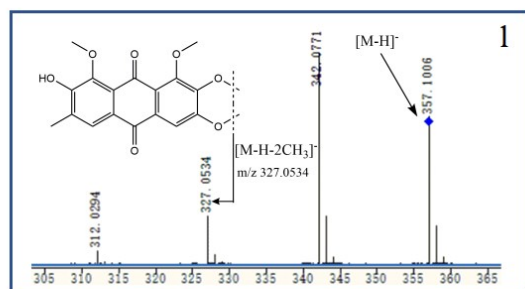

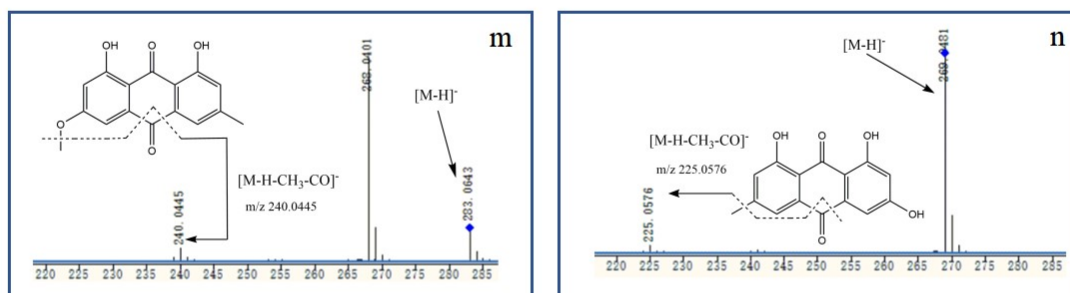

**Fig. S2** The mass spectrum for 14 peaks obtained in negative mode.

- a. Cassialactone gentiobioside      b. Cassiaside B<sub>2</sub>      c. Rubrofusatin triglucoside  
d. Isorubrofusarin-6-*O*-β-gentiobioside      e. Cassiaside      f. Cassiaside C  
g. Nor-rubrofusarin-6-*O*-β-D-(6-*O*-acetyl)-glucopyranoside  
h. Rubrofusarin-6-*O*-β-D- glucopyranoside      i. Aurantio-obtusin      j. Alaternin  
k. Obtusifolin      l. Chrssoobtusin      m. Physcion      n. Emodin

**Table S1** The 30 batches of raw and fried Cassiae Semen samples from different sources and collection time.

| Sample number | Sample name       | Sample number | Sample name         | Sample sources | Collection time |
|---------------|-------------------|---------------|---------------------|----------------|-----------------|
| S1            | Raw Cassiae Semen | C1            | Fried Cassiae Semen | Guangxi        | 20210705        |
| S2            | Raw Cassiae Semen | C2            | Fried Cassiae Semen | Hebei          | 20210705        |
| S3            | Raw Cassiae Semen | C3            | Fried Cassiae Semen | Hubei          | 20210705        |
| S4            | Raw Cassiae Semen | C4            | Fried Cassiae Semen | Gansu          | 20210705        |
| S5            | Raw Cassiae Semen | C5            | Fried Cassiae Semen | Zhejiang       | 20210705        |
| S6            | Raw Cassiae Semen | C6            | Fried Cassiae Semen | Ningxia        | 20210705        |
| S7            | Raw Cassiae Semen | C7            | Fried Cassiae Semen | Guangdong      | 20210705        |
| S8            | Raw Cassiae Semen | C8            | Fried Cassiae Semen | Anhui          | 20210705        |
| S9            | Raw Cassiae Semen | C9            | Fried Cassiae Semen | Shandong       | 20210705        |
| S10           | Raw Cassiae Semen | C10           | Fried Cassiae Semen | Zhejiang       | 20210716        |
| S11           | Raw Cassiae Semen | C11           | Fried Cassiae Semen | Henan          | 20210717        |
| S12           | Raw Cassiae Semen | C12           | Fried Cassiae Semen | Anhui          | 20210718        |
| S13           | Raw Cassiae Semen | C13           | Fried Cassiae Semen | Anhui          | 20210718        |
| S14           | Raw Cassiae Semen | C14           | Fried Cassiae Semen | Ningxia        | 20210718        |
| S15           | Raw Cassiae Semen | C15           | Fried Cassiae Semen | Shandong       | 20210721        |

**Table S2** Identification of 13 potential hypoglycemic compounds from 15 batches of raw Cassiae Semen by UHPLC-QTOF-MS/MS

| Common peaks | t <sub>R</sub> (min) | [M-H] <sup>-</sup> | Formula                                         | MS fragments                 | Peak identification                                                     | References |
|--------------|----------------------|--------------------|-------------------------------------------------|------------------------------|-------------------------------------------------------------------------|------------|
| P3           | 11.203               | 627.1955           | C <sub>28</sub> H <sub>36</sub> O <sub>16</sub> | 304.9148                     | Cassialactone gentiobioside                                             | 42         |
| P4           | 12.436               | 595.1704           | C <sub>27</sub> H <sub>32</sub> O <sub>15</sub> | 271.0628                     | Isorubrofusarin-6- <i>O</i> -β-gentiobioside                            | 41         |
| P7           | 15.216               | 757.2210           | C <sub>33</sub> H <sub>42</sub> O <sub>20</sub> | 271.9638, 256.9107           | Rubrofusatin triglucoside                                               | 41         |
| P10          | 17.703               | 419.0994           | C <sub>20</sub> H <sub>20</sub> O <sub>10</sub> | 257.0454                     | Cassiaside                                                              | 41         |
| P13          | 20.043               | 595.1685           | C <sub>27</sub> H <sub>32</sub> O <sub>15</sub> | 271.0611, 256.9103           | Cassiaside C                                                            | 41         |
| P15          | 24.336               | 461.1101           | C <sub>22</sub> H <sub>22</sub> O <sub>11</sub> | 299.1306, 257.0459           | Nor-rubrofusarin-6- <i>O</i> -β-D-(6- <i>O</i> -acetyl)-glucopyranoside | 41         |
| P17          | 25.970               | 433.1143           | C <sub>21</sub> H <sub>22</sub> O <sub>10</sub> | 271.0610, 256.9106, 228.9615 | Rubrofusarin-6- <i>O</i> -β-D-glucopyranoside                           | 41         |
| P21          | 32.078               | 329.0703           | C <sub>17</sub> H <sub>14</sub> O <sub>7</sub>  | 314.0455, 285.0743           | Aurantio-obtusin                                                        | 43         |
| P22          | 32.576               | 285.0433           | C <sub>15</sub> H <sub>10</sub> O <sub>6</sub>  | 271.0617, 257.0784, 242.9440 | Alaternin                                                               | 42         |
| P23          | 33.619               | 283.0630           | C <sub>16</sub> H <sub>12</sub> O <sub>5</sub>  | 268.0403, 240.1548           | Obtusifolin                                                             | 43         |
| P24          | 34.392               | 357.1014           | C <sub>19</sub> H <sub>18</sub> O <sub>7</sub>  | 342.0749, 242.9439           | Chrysoobtusin                                                           | 43         |
| P26          | 36.320               | 283.0630           | C <sub>16</sub> H <sub>12</sub> O <sub>5</sub>  | 268.0389, 240.3601, 212.4320 | Physcion                                                                | 41         |
| P27          | 37.226               | 269.0474           | C <sub>15</sub> H <sub>10</sub> O <sub>5</sub>  | 253.9064, 241.0625           | Emodin                                                                  | 41         |

**Table S3** Identification of 14 potential hypoglycemic compounds from 15 batches of fried Cassiae Semen by UHPLC-QTOF-MS/MS

| Common peaks | t <sub>R</sub> (min) | [M-H] <sup>-</sup> | Formula                                         | MS fragments                 | Peak identification                                                     | References |
|--------------|----------------------|--------------------|-------------------------------------------------|------------------------------|-------------------------------------------------------------------------|------------|
| P2           | 11.145               | 627.1985           | C <sub>28</sub> H <sub>36</sub> O <sub>16</sub> | 304.9167                     | Cassialactone gentiobioside                                             | 42         |
| P4           | 13.372               | 919.2804           | C <sub>39</sub> H <sub>52</sub> O <sub>25</sub> | 942.2644, 921.2856, 273.0712 | Cassiaside B <sub>2</sub>                                               | 41         |
| P5           | 15.172               | 757.2255           | C <sub>33</sub> H <sub>42</sub> O <sub>20</sub> | 271.9653, 256.9122           | Rubrofusatin triglucoside                                               | 41         |
| P6           | 16.672               | 595.1722           | C <sub>27</sub> H <sub>32</sub> O <sub>15</sub> | 271.0633                     | Isorubrofusarin-6- <i>O</i> -β-gentiobioside                            | 41         |
| P7           | 17.732               | 419.1024           | C <sub>20</sub> H <sub>20</sub> O <sub>10</sub> | 271.0271, 257.0476           | Cassiaside                                                              | 41         |
| P10          | 20.078               | 595.1722           | C <sub>27</sub> H <sub>32</sub> O <sub>15</sub> | 271.0634, 256.0276           | Cassiaside C                                                            | 41         |
| P11          | 24.305               | 461.1101           | C <sub>22</sub> H <sub>22</sub> O <sub>11</sub> | 299.1330, 257.0472           | Nor-rubrofusarin-6- <i>O</i> -β-D-(6- <i>O</i> -acetyl)-glucopyranoside | 41         |
| P13          | 25.978               | 433.1143           | C <sub>21</sub> H <sub>22</sub> O <sub>10</sub> | 271.0630, 256.9124, 228.9622 | Rubrofusarin-6- <i>O</i> -β-D- glucopyranoside                          | 41         |
| P18          | 32.078               | 329.0703           | C <sub>17</sub> H <sub>14</sub> O <sub>7</sub>  | 314.0456, 285.0744           | Aurantio-obtusin                                                        | 43         |
| P19          | 32.572               | 285.0433           | C <sub>15</sub> H <sub>10</sub> O <sub>6</sub>  | 271.0617, 257.0784, 242.9440 | Alaternin                                                               | 42         |
| P20          | 33.620               | 283.0644           | C <sub>16</sub> H <sub>12</sub> O <sub>5</sub>  | 268.0415, 240.1557           | Obtusifolin                                                             | 43         |
| P21          | 34.425               | 357.1015           | C <sub>19</sub> H <sub>18</sub> O <sub>7</sub>  | 342.0771, 242.9479           | Chrysoobtusin                                                           | 43         |
| P23          | 36.320               | 283.0646           | C <sub>16</sub> H <sub>12</sub> O <sub>5</sub>  | 268.0405, 240.3601, 212.4320 | Physcion                                                                | 41         |
| P24          | 37.210               | 269.0493           | C <sub>15</sub> H <sub>10</sub> O <sub>5</sub>  | 253.9084, 241.0647           | Emodin                                                                  | 41         |
